# Supplementary material
Source: publisher site journal article supplement (https://static.cambridge.org/content/id/urn:cambridge.org:id:article:S1041610206003619/resource/name/Chachamovich_supplementary_Tables.doc)
Supplement: Supplementary file 1 [file Chachamovich_supplementary_Tables.doc]

**Table S1.** Results of multiple linear regression between WHOQOL-BREF domain and overall scores (*n* = 424)

| DOMAIN | ** | *T* | *p* |
| --- | --- | --- | --- |
| Physical | 0.483 | 12.47 | 0.000 |
| Psychological | 0.263 | 6.22 | 0.000 |
| Social relationships | 0.068 | 1.88 | 0.061 |
| Environmental | 0.131 | 3.31 | 0.001 |

*R*2 = 64.7%.

**Table S2.** Correlations between WHOQOL-BREF overall and domain scores (*n* = 424)

| DOMAIN | PHYSICAL | PSYCHOLOGICAL | SOCIAL RELATIONSHIPS | ENVIRONMENTAL | OVERALL |
| --- | --- | --- | --- | --- | --- |
| Physical |  |  |  |  |  |
| Psychological | 0.602 |  |  |  |  |
| Social relationships | 0.430 | 0.551 |  |  |  |
| Environmental | 0.565 | 0.607 | 0.491 |  |  |
| Overall | 0.744 | 0.667 | 0.481 | 0.595 |  |

*p*< 0.001 for all correlations.
